# Supplementary material for: Single-cell transcriptomics reveals cellular heterogeneity of condylar chondrocytes in SD rat temporomandibular joint osteoarthritis
Source: Research Square preprint supplement (doi:10.21203/rs.3.rs-7638769/v1), 2025-11-17

This file contains the full uncropped gels and blots corresponding to Figures 5 in the main manuscript. Each blot is labeled with the target protein and linked to its corresponding figure panel in the article.

### Page 1

**Protein: GAPDH**
Corresponding to: Figure 5A


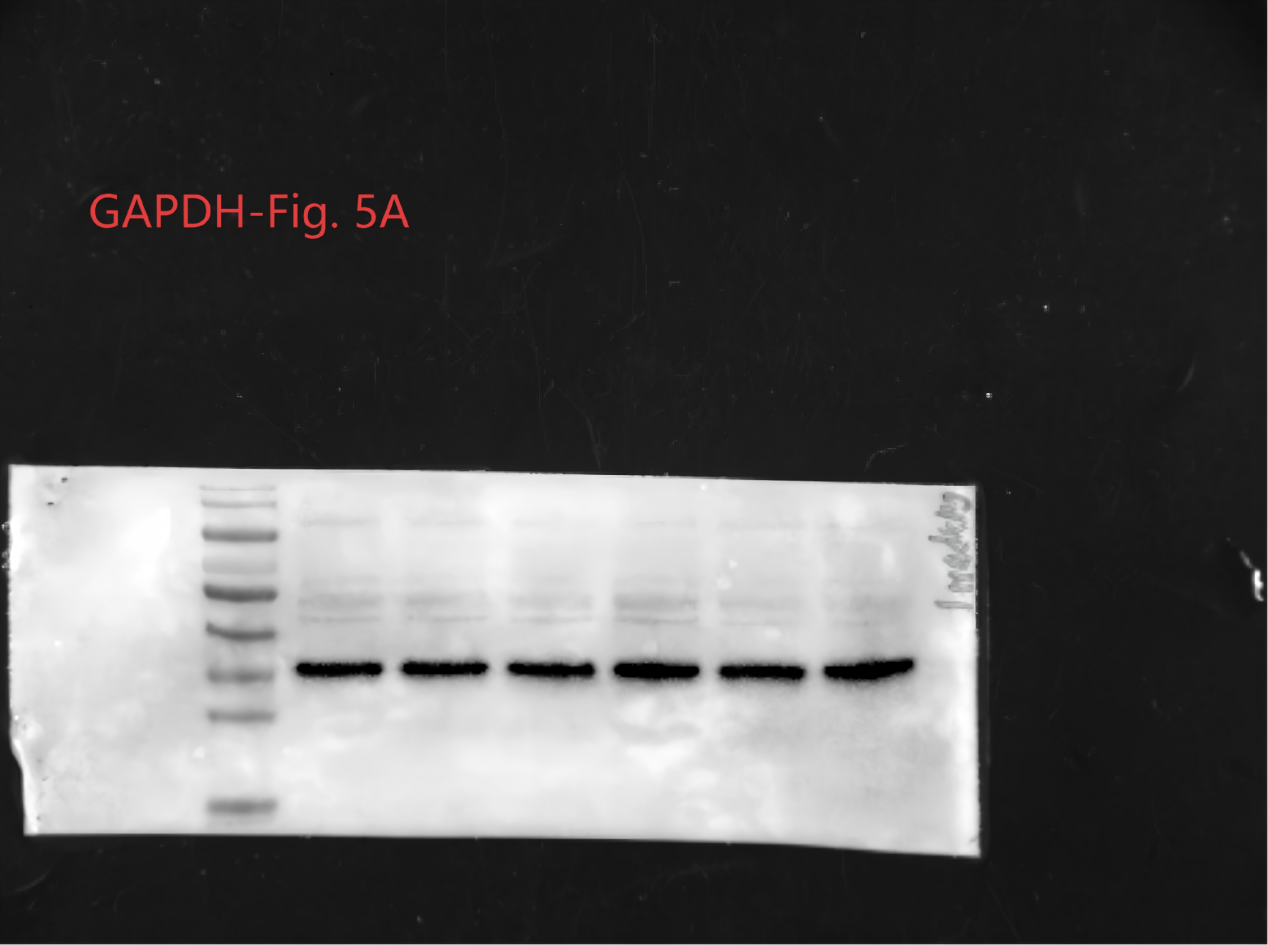


### Page 2

**Protein: ADAMTS5**
Corresponding to: Figure 5A


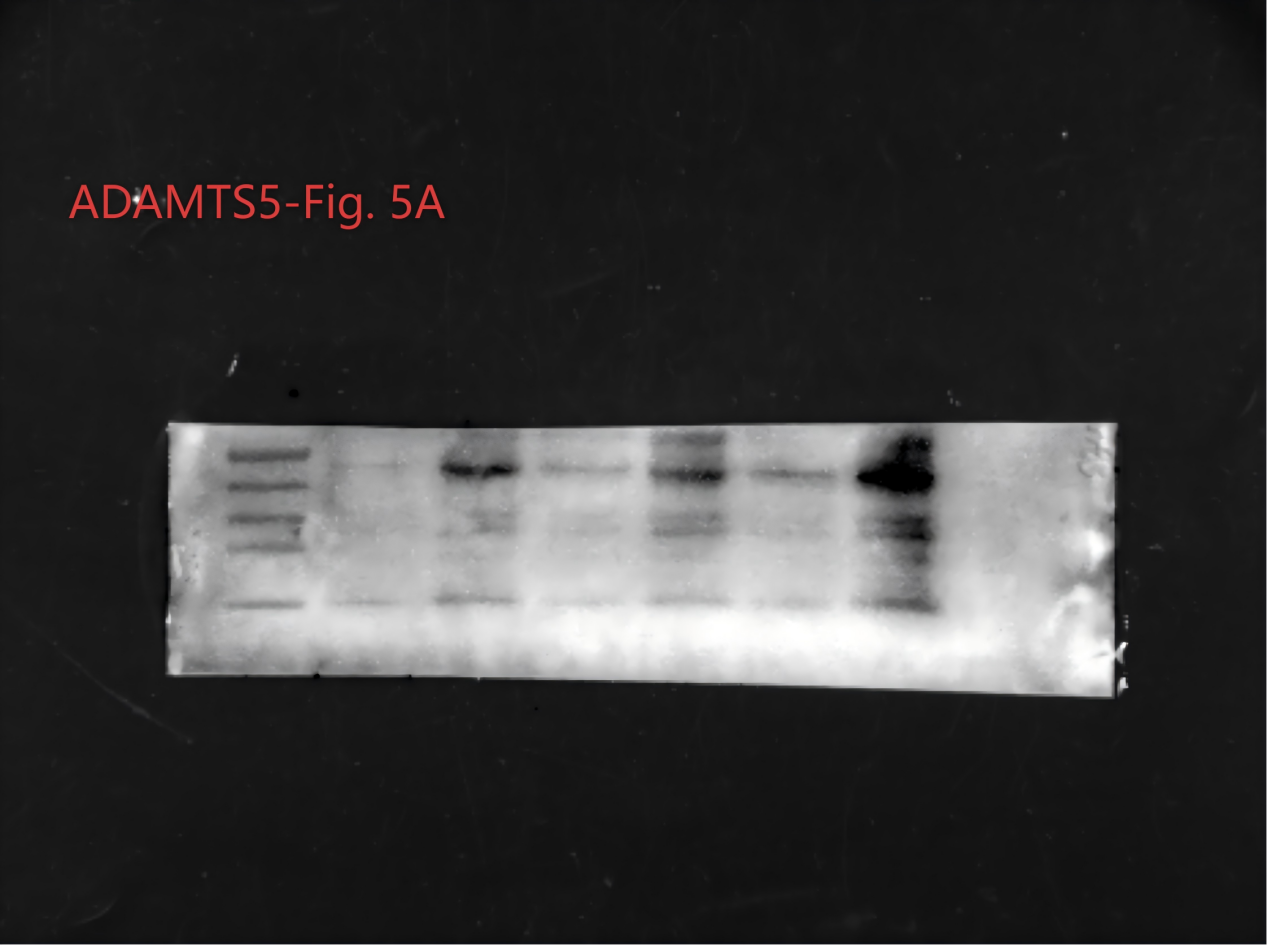


### Page 3

**Protein:CAMP**
Corresponding to: Figure 5A


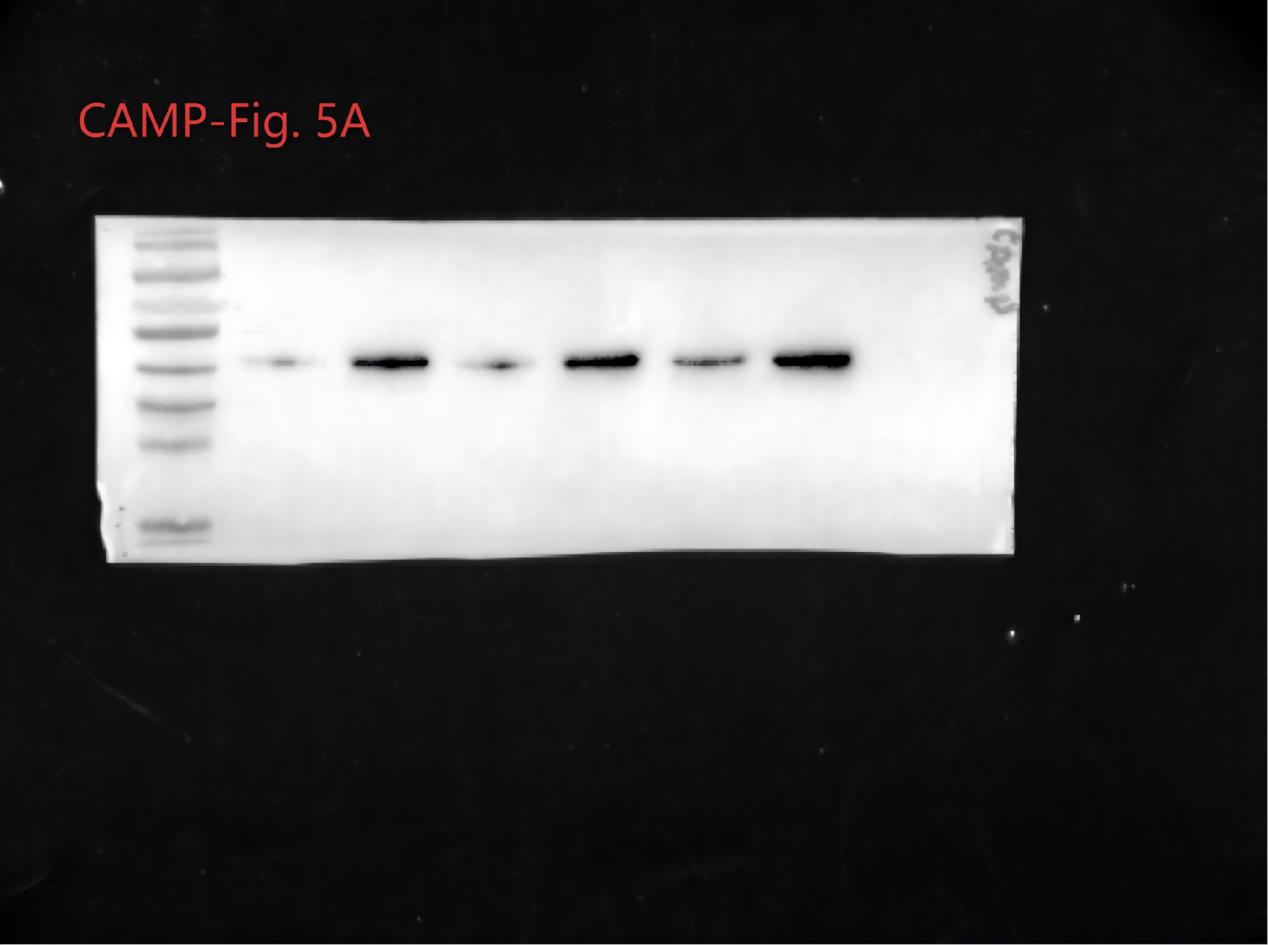


### Page 4

**Protein: COL2A1**
Corresponding to: Figure 5A


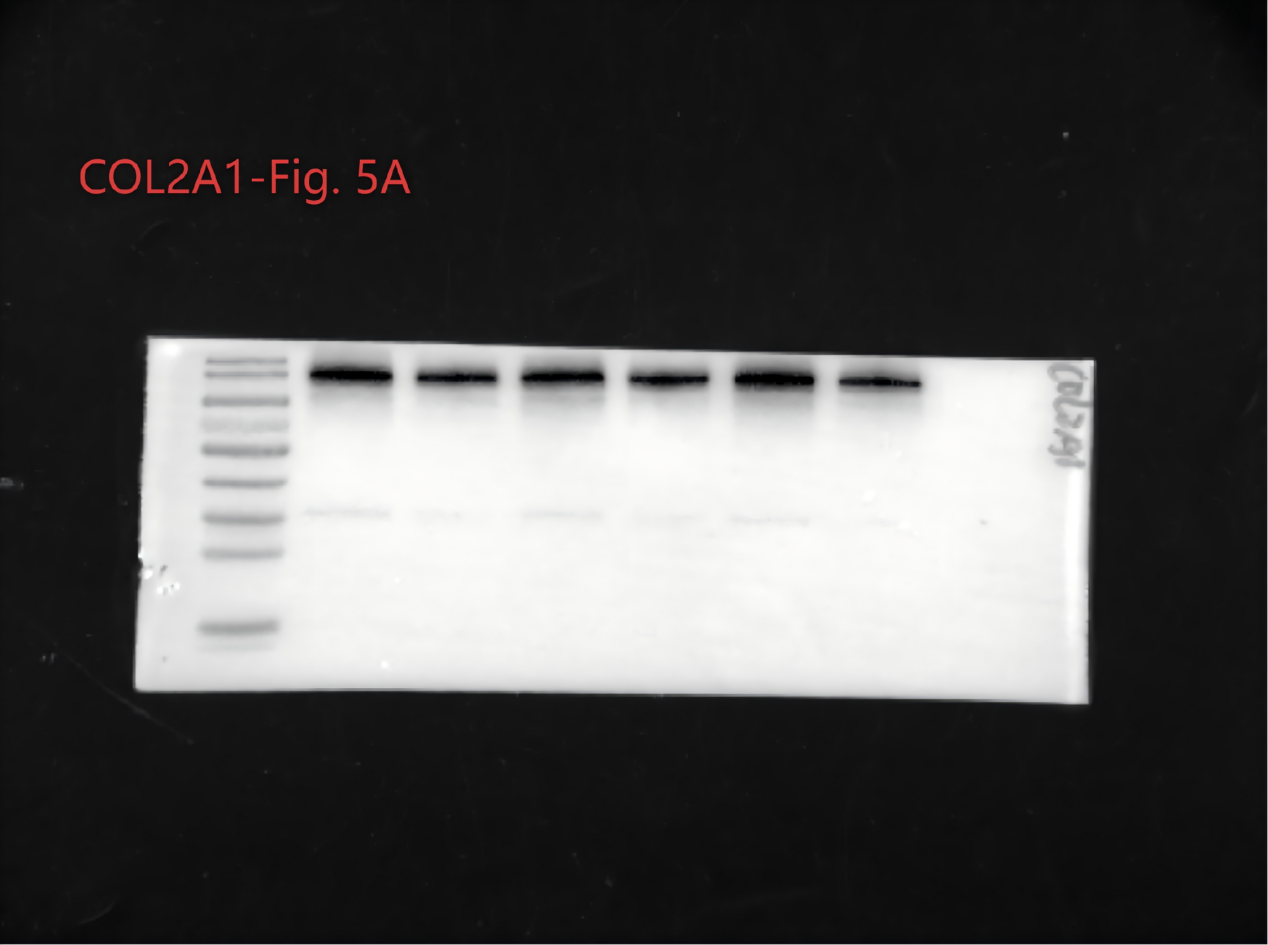


### Page 5

**Protein: IL-1β**
Corresponding to: Figure 5A


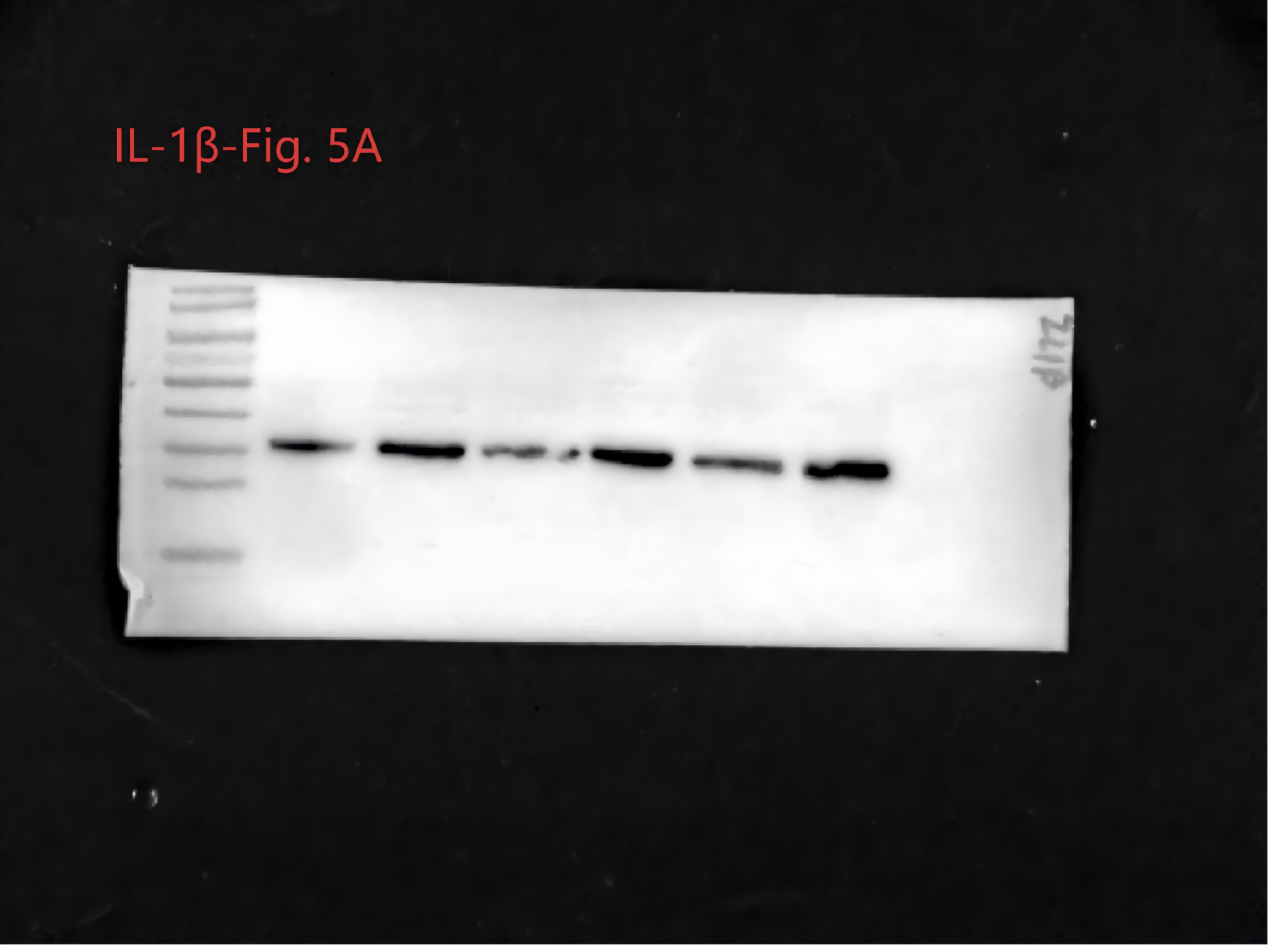


### Page 6

**Protein: MMP13**
Corresponding to: Figure 5A


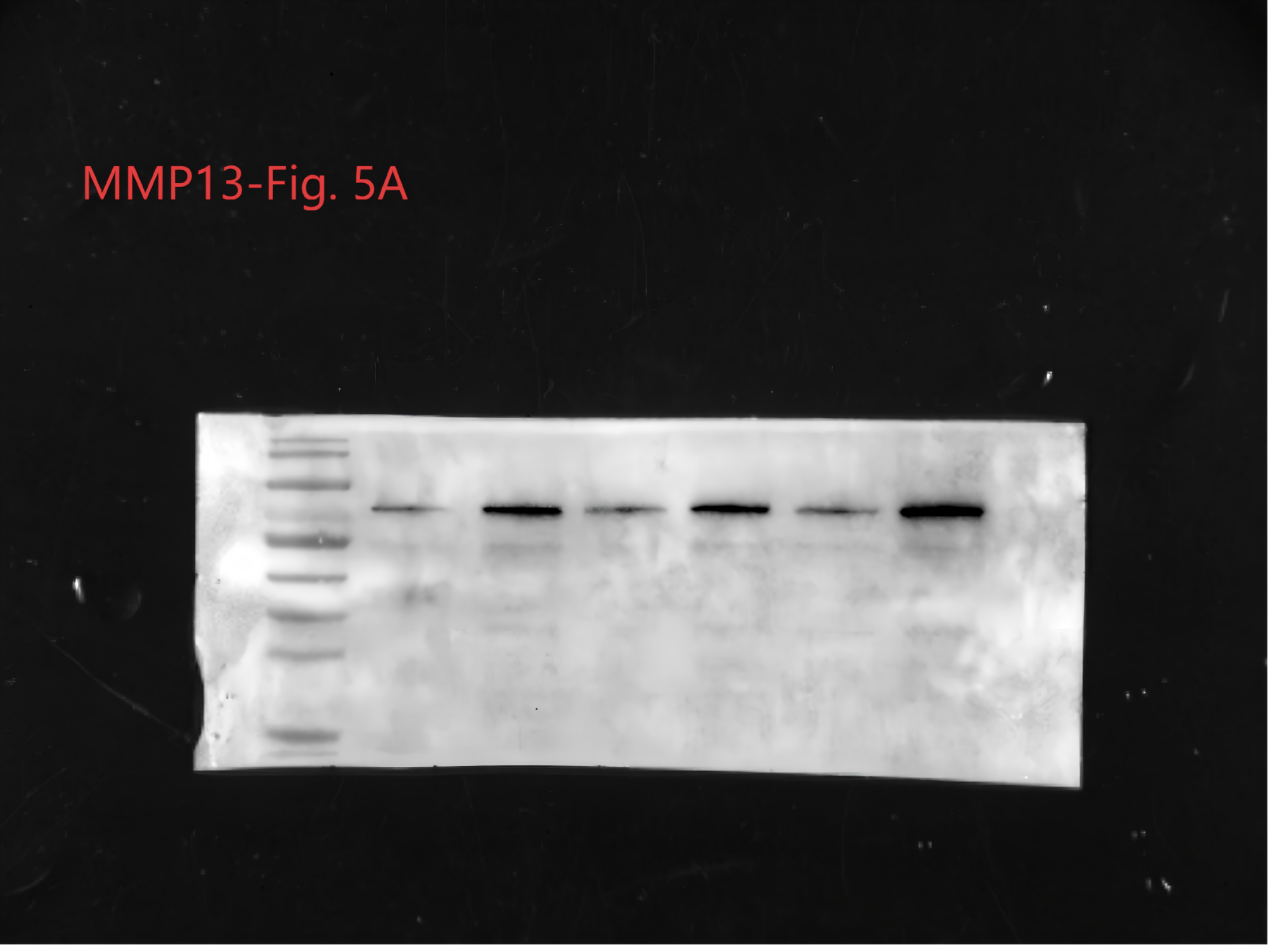


### Page 7

**Protein: S100a9**
Corresponding to: Figure 5A


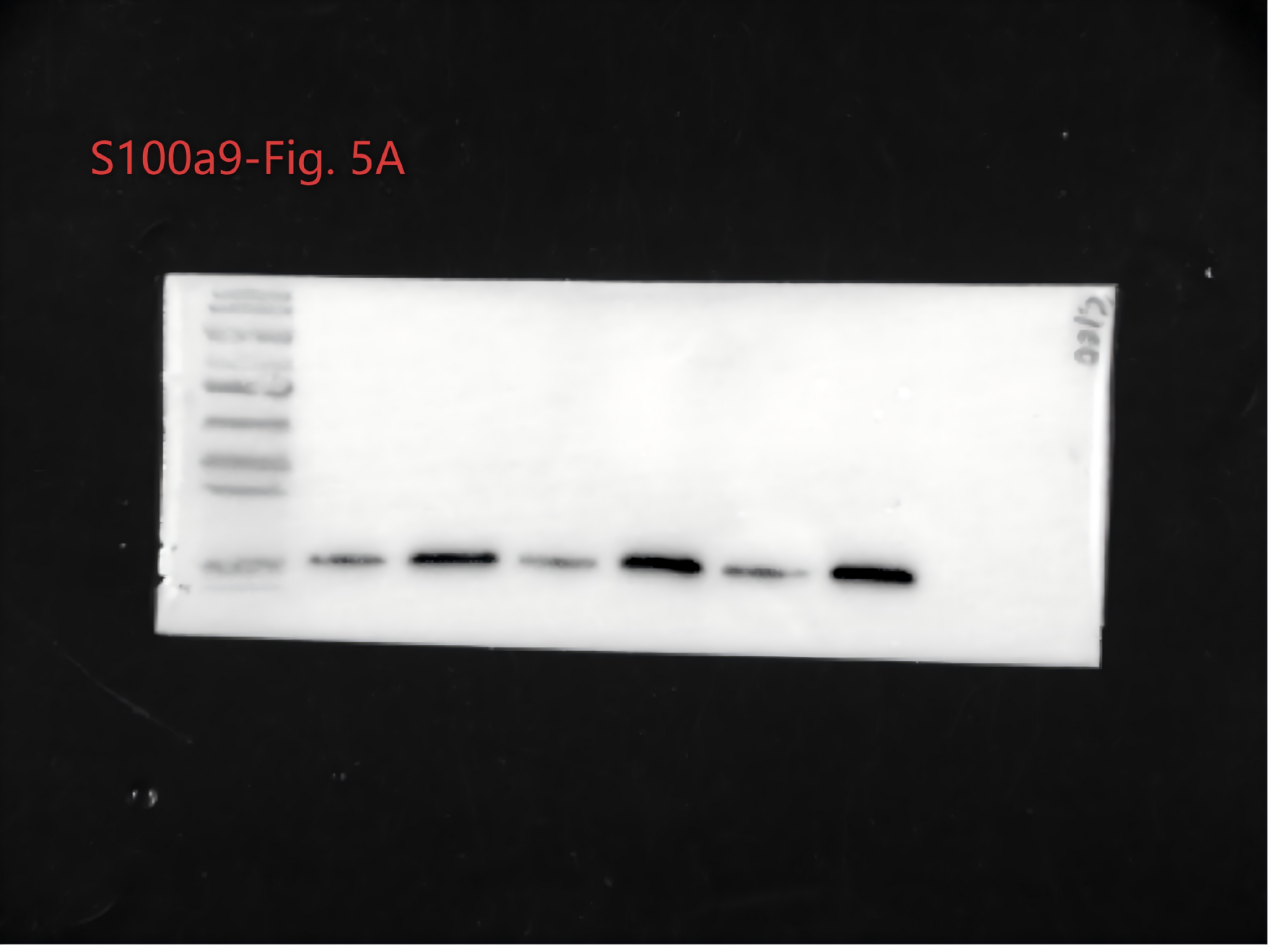

Supplement: Supplementary file 1 [file 008320529cc418266e75265e.docx]
